# Supplementary material for: A biphasic batch and continuous flow synthesis of hydrophobic gold and silver nanoparticles
Source: Royal Society of Chemistry journal article supplement (doi:10.1039/d3re00132f), 2023-01-01
Supplement: d3re00132f1.pdf [file d3re00132f1.pdf]

## A biphasic batch and continuous flow synthesis of hydrophobic gold and silver nanoparticles

Monica Distaso,<sup>a,b</sup> Wolfgang Peukert<sup>a,b</sup>

<sup>a</sup>Institute of Particle Technology, Friedrich-Alexander-Universität Erlangen-Nürnberg, Cauerstraße 4, 91058 Erlangen (Germany);

<sup>b</sup>Interdisciplinary Centre for Functional Particle Systems, Friedrich-Alexander-Universität Erlangen-Nürnberg, Haberstraße 9a 91058 Erlangen (Germany)

### Summary

- 1 Additional <sup>13</sup>C NMR spectra of OLAC and OLA in Tol-d8
- 2 SEM-EDX analysis of AgBr and AgCl particles

### 1. Additional <sup>13</sup>C NMR spectra of OLAC and OLA in Tol-d8

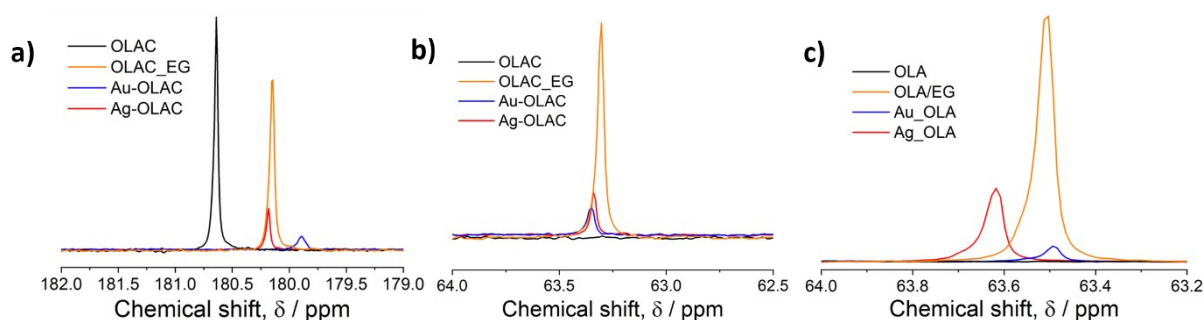

**Fig. S1.** Close up of the NMR spectra of ligands in Tol-d8 in the presence of EG, gold and silver precursors. a) Low field <sup>13</sup>C NMR spectra of the experiments with OLAC, showing the shift of the carboxylic carbon atoms at higher magnetic fields upon transfer of EG, gold and silver precursors in Tol-d8; b) <sup>13</sup>C NMR spectra of the experiments with OLAC showing the shift of the EG signal upon transfer of EG, gold and silver precursors in Tol-d8; c) <sup>13</sup>C NMR spectra of the experiments with OLA showing the shift of the EG signal upon transfer of EG, gold and silver precursors in Tol-d8.

## 2. SEM-EDX analysis of AgBr and AgCl

The solid precipitated at the liquid-liquid interfaces and reported in Fig. 6c of the main manuscript was characterized by SEM-EDX analysis. An acceleration Voltage of 10 kV was used. The results show that the solid comprise Ag and Br in 1 to 1 ratio.

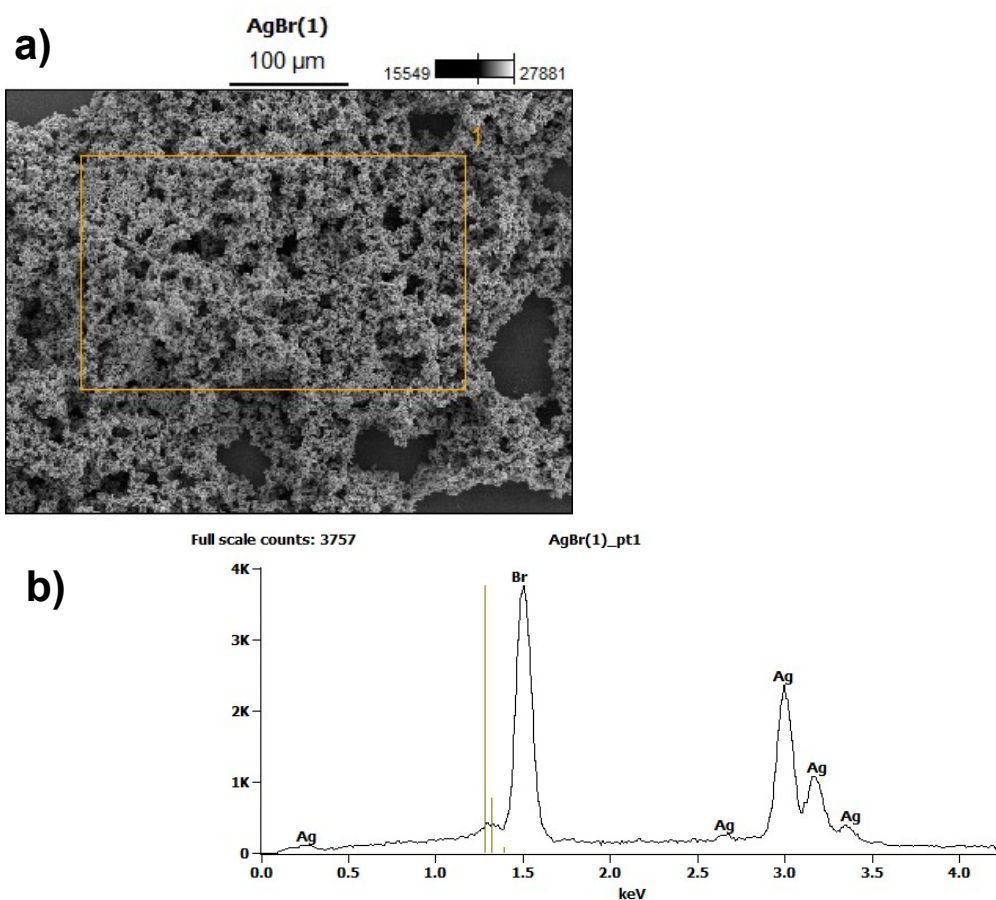

**Fig. S2.** a) SEM image of the solid isolated at the EG/Tol interface in the control experiment described in Fig 6c of the manuscript, with highlighted area of EDX analysis; b) corresponding EDX analysis.

**Table S1.** Quantitative evaluation of the SEM-EDX analysis of the solid isolated in the presence of D12DABr and reported in Fig. 6c of the main manuscript. The ratio 1 to 1 for Ag and Br is expected for AgBr particles.

Atom %

|                    | <i>Br-L</i> | <i>Ag-L</i> |
|--------------------|-------------|-------------|
| <i>AgBr(1)_pt1</i> | 49.73       | 50.27       |

Atom % Error (+/- 1 Sigma)

|                    | <i>Br-L</i> | <i>Ag-L</i> |
|--------------------|-------------|-------------|
| <i>AgBr(1)_pt1</i> | ±0.44       | ±0.76       |

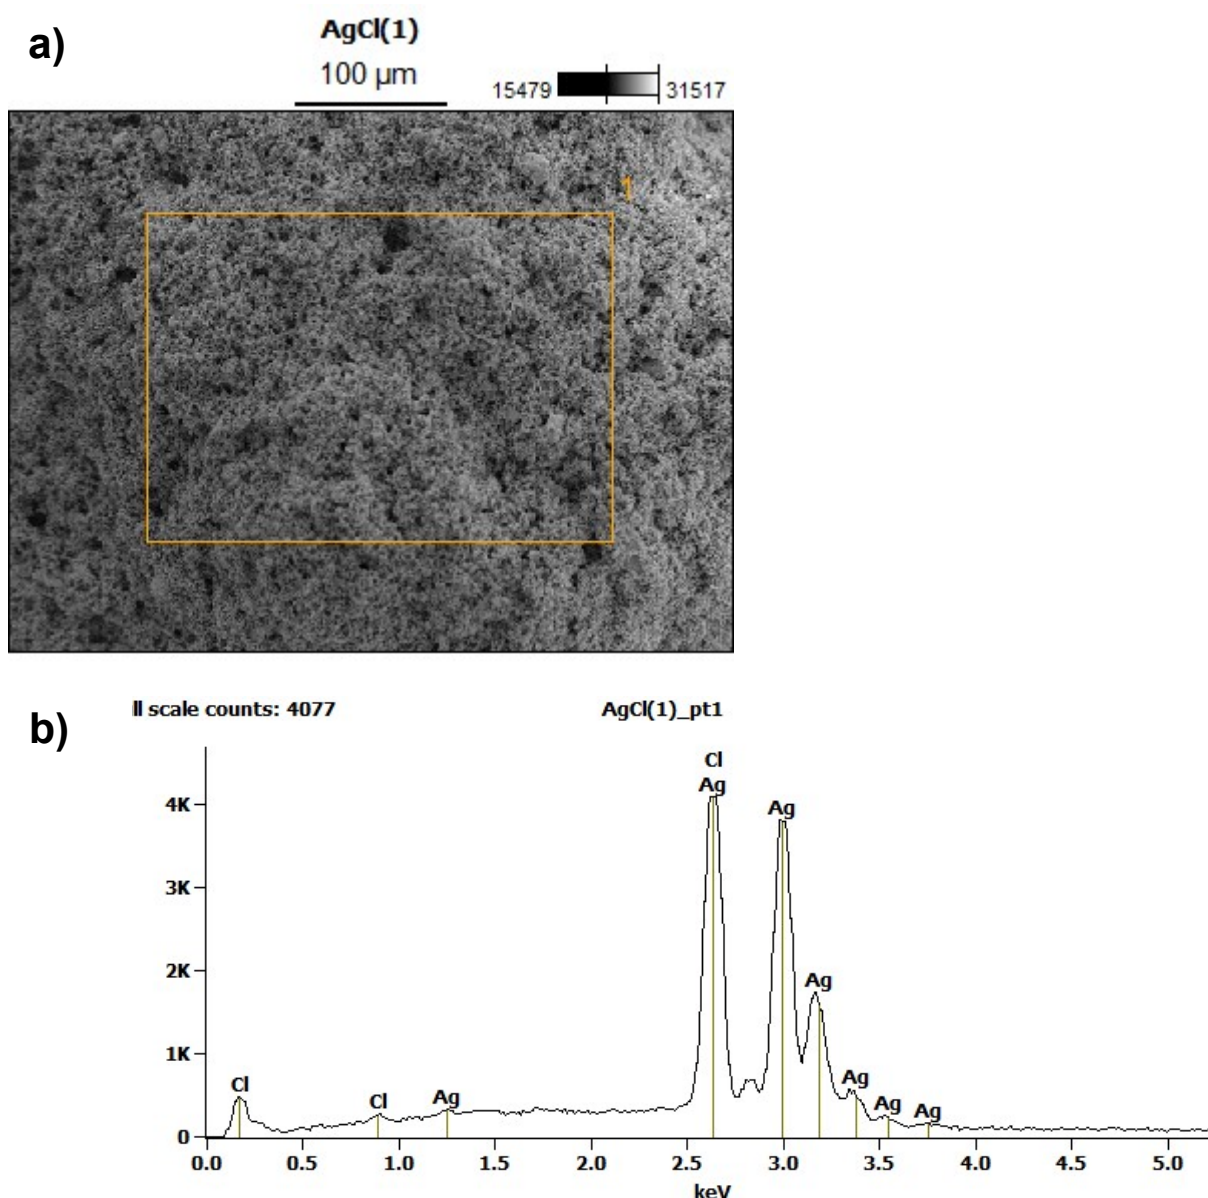

**Fig. S3.** a) SEM image of the solid isolated using  $D_{10}$ DACl as phase transfer agent without OLA or OLAC. On the highlighted area, EDX analysis was carried out; b) corresponding EDX analysis.

**Table S2.** Quantitative evaluation of the SEM-EDX analysis of the solid isolated using  $D_{10}$ DACl as phase transfer agent without OLA or OLAC. The ratio 1 to 1 for Ag and Cl is expected for AgCl particles.

Atom %

|                    | <i>Cl-K</i> | <i>Ag-L</i> |
|--------------------|-------------|-------------|
| <b>AgCl(1)_pt1</b> | 50.45       | 49.55       |

Atom % Error (+/- 1 Sigma)

|                    | <i>Cl-K</i> | <i>Ag-L</i> |
|--------------------|-------------|-------------|
| <b>AgCl(1)_pt1</b> | $\pm 0.49$  | $\pm 0.66$  |
